# Supplementary material for: Occurrence of Chlamydiae in Corvids in Northeast Italy
Source: MDPI journal article supplement (doi:10.3390/ani12101226), 2022-05-10
Supplement: s1 [file s1]

**Table S1.** *Chlamydia* species used to test the specificity of the *enoA*-based *C. psittaci* and *enoA*-based *C. abortus* rtPCRs. Origin of the strains/field isolates: <sup>a</sup>CHU Amiens, France; <sup>b</sup>INRAE Tours, France; <sup>c</sup>Anses Maisons-Alfort, France; <sup>d</sup>Faculty of Veterinary Medicine–Aristotle University of Thessaloniki, Greece; <sup>e</sup>Friedrich-Loeffler-Institut, Germany; <sup>f</sup>vaccine strain; <sup>g</sup>Istituto Zooprofilattico Sperimentale delle Venezie.

| Species                 | Strains/field isolates                                                                                                                                                                                                                                | <i>C. psittaci</i><br>rtPCR | <i>C. abortus</i><br>rtPCR |
|-------------------------|-------------------------------------------------------------------------------------------------------------------------------------------------------------------------------------------------------------------------------------------------------|-----------------------------|----------------------------|
| <i>C. psittaci</i>      | Loth <sup>a</sup> , VS1 <sup>b</sup> , L2A <sup>b</sup> , CP3 <sup>b</sup> , GR9 <sup>b</sup> , TT3 <sup>b</sup> , NJ1 <sup>b</sup> , Cal 10 <sup>b</sup> , 13-2791_BC-038 <sup>c</sup> , 13-2791_BC-065 <sup>c</sup>                                 | <b>Positive</b>             | Negative                   |
| <i>C. abortus</i>       | 1B <sup>b</sup> , 1H <sup>b</sup> , 1H77 <sup>b</sup> , AB1 <sup>b</sup> , AB2 <sup>b</sup> , AB4 <sup>b</sup> , AB7 <sup>b</sup> , AB7b <sup>b</sup> , AB13 <sup>b</sup> , iC1 <sup>b</sup> , AC1 <sup>b</sup> , POS <sup>d</sup> , LLG <sup>d</sup> | Negative                    | <b>Positive</b>            |
| Avian <i>C. abortus</i> | 15-49D/3 (PS2) <sup>e</sup> , 15-58D/44 (1V) <sup>e</sup> , 15-48D/9 (PS2) <sup>e</sup> , 15-70D/24 (PS1) <sup>e</sup>                                                                                                                                | Negative                    | <b>Positive</b>            |
| <i>C. pecorum</i>       | iB3 <sup>b</sup> , iB4 <sup>b</sup> , iC3 <sup>b</sup> , iC4 <sup>b</sup>                                                                                                                                                                             | Negative                    | Negative                   |
| <i>C. felis</i>         | Dohycat <sup>f</sup>                                                                                                                                                                                                                                  | Negative                    | Negative                   |
| <i>C. caviae</i>        | GPIC <sup>b</sup>                                                                                                                                                                                                                                     | Negative                    | Negative                   |
| <i>C. trachomatis</i>   | MRC1 <sup>b</sup>                                                                                                                                                                                                                                     | Negative                    | Negative                   |
| <i>C. gallinacea</i>    | 08-1274/3 <sup>c</sup>                                                                                                                                                                                                                                | Negative                    | Negative                   |
| <i>C. avium</i>         | 10-743/SC13 <sup>c</sup>                                                                                                                                                                                                                              | Negative                    | Negative                   |
| <i>C. ibidis</i>        | 10-3098 <sup>c</sup>                                                                                                                                                                                                                                  | Negative                    | Negative                   |
| <i>C. suis</i>          | 21 <sup>g</sup> , MS06 <sup>g</sup>                                                                                                                                                                                                                   | Negative                    | Negative                   |

(A). *C. psittaci enoA* rtPCR

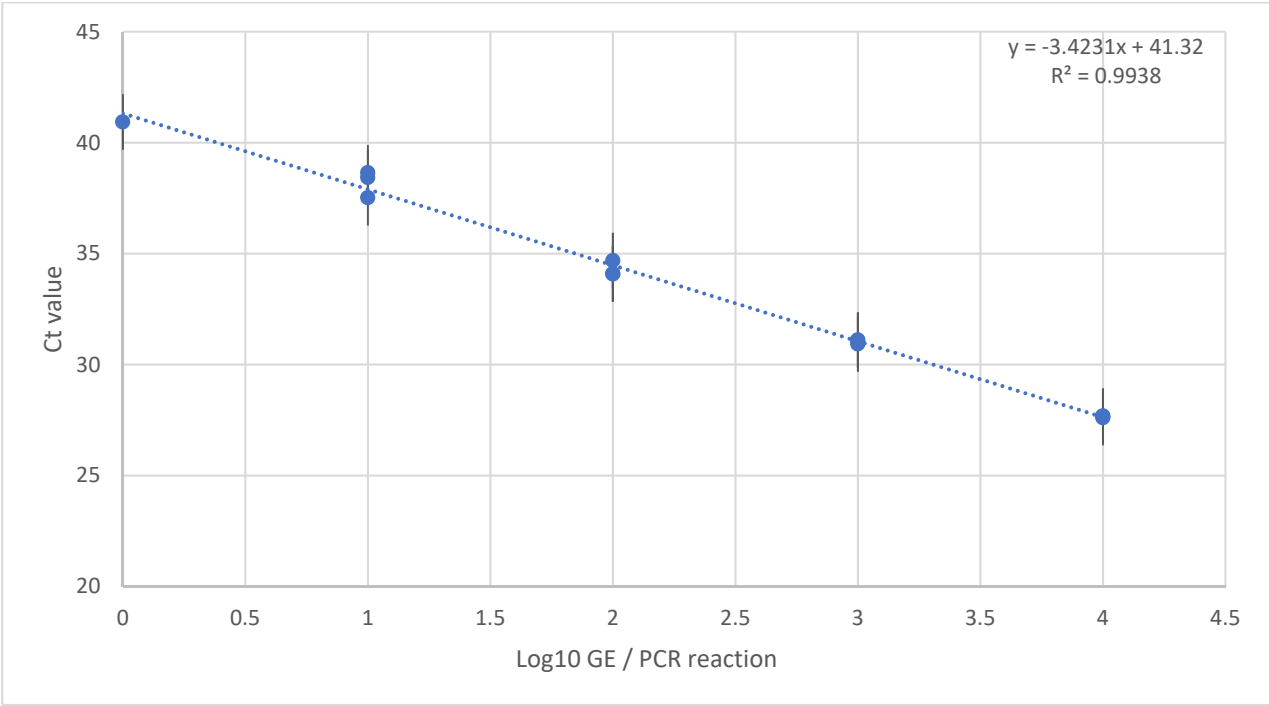

(B). *C. abortus enoA* rtPCR

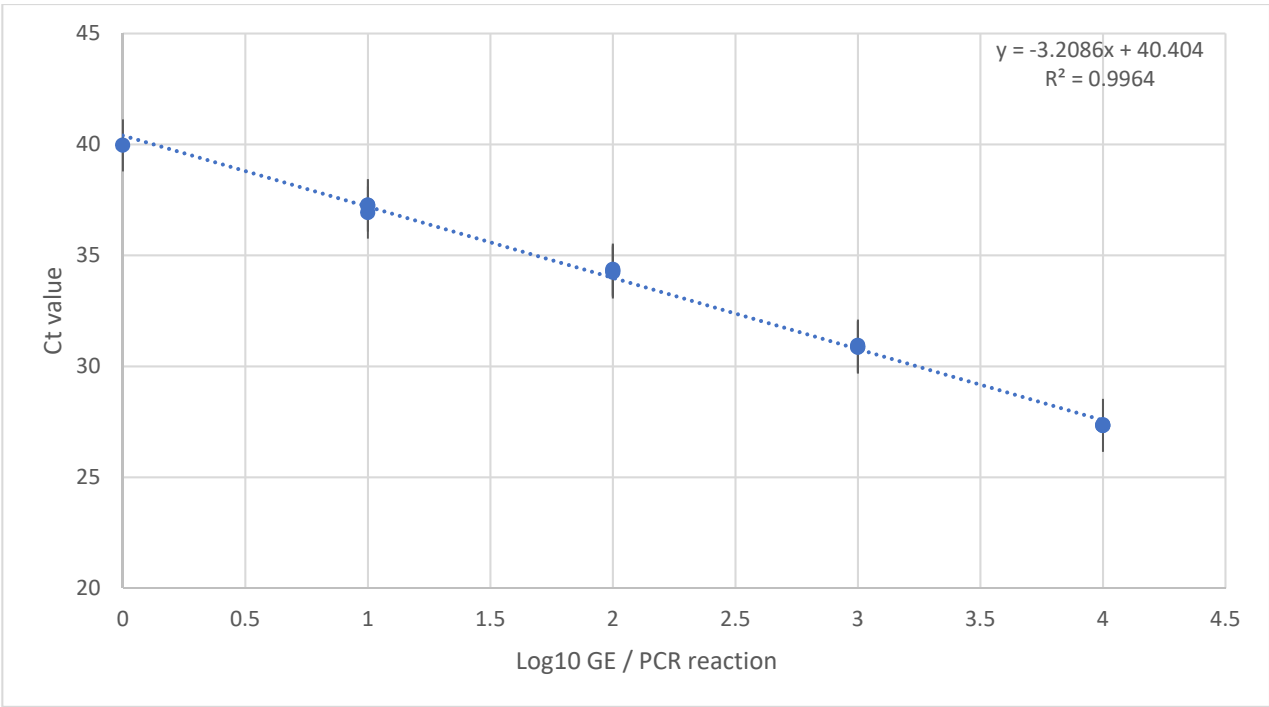

**Figure S1. Real-time PCR sensitivity test to detect the genomic DNA from *C. psittaci* Loth isolate (A) and *C. abortus* S26/3strain (B).** DNA was extracted and serially diluted. The titre of the genome equivalent (GE) was estimated from the Ct value based on the calibration curve from serial 10-fold dilutions of purified DNA extracted from cell culture containing defined numbers of GE of Loth *C. psittaci* isolate (A) and S26/3 *C. abortus* strain (B). Each dilution was subjected to real-time PCR analysis in triplicate. Y axis corresponds to Ct value and X axis corresponds to Log10 GE/PCR reaction (i.e. 2 µL). (A). *C. psittaci* parameters: the R<sup>2</sup> linearity value from the linear regression is 0.994.  $y = -3.42x + 41.32$  and efficiency= 95.94%%. (B). *C. abortus* parameters: the R<sup>2</sup> linearity value from the linear regression is 0.996.  $y = -3.21x + 40.40$  and efficiency= 104.96%.
